# Supplementary material
Source: PubMed Central journal article supplement (PMC7310518)
Supplement: NIHMS1598638-supplement-Supplement.pdf [file NIHMS1598638-supplement-Supplement.pdf]

## Supplementary Information

### The Pimeloyl-CoA Synthase BioW Defines a New Fold for Adenylate-Forming Enzymes

Paola Estrada<sup>1</sup>, Miglena Manandhar<sup>2</sup>, Shi-Hui Dong<sup>1,3</sup>, Jaigeeth Deveryshetty<sup>3</sup>, Vinayak  
Agarwal<sup>3,4</sup>, John E. Cronan<sup>1,2,3</sup>, and Satish K. Nair<sup>1,3,4\*</sup>

<sup>1</sup>Department of Biochemistry, <sup>2</sup>Department of Microbiology, <sup>3</sup>Institute for Genomic Biology and  
<sup>4</sup>Center for Biophysics and Computational Biology, University of Illinois at Urbana Champaign,  
600 S. Mathews Ave, Urbana IL USA

\* Address all correspondence: Satish K. Nair, 600 S. Mathews Ave., University of Illinois at  
Urbana-Champaign, Urbana, IL 61801, snair@illinois.edu

## Supplementary Results

### Table of contents:

|                                                                                             | Page |
|---------------------------------------------------------------------------------------------|------|
| <b>Supplementary Table 1:</b> List of primers used in this study                            | 2    |
| <b>Supplementary Table 2:</b> Data collection, phasing and refinement statistics            | 3    |
| <b>Supplementary Figure 1:</b> Binding isotherms for BioW                                   | 4    |
| <b>Supplementary Figure 2:</b> Dependence of BioW activity on Mg <sup>2+</sup>              | 5    |
| <b>Supplementary Figure 3:</b> Proofreading of non-cognate C5 adenylate as a function of pH | 6    |
| <b>Supplementary Figure 4:</b> Topology of AaBioW                                           | 7    |
| <b>Supplementary Figure 5:</b> Structural homologs of BioW                                  | 8    |
| <b>Supplementary Figure 6:</b> Side chain movement of active site Arg during catalysis      | 9    |
| <b>Supplementary Figure 7:</b> Structure-based multiple sequence alignment of various BioW  | 10   |
| <b>Supplementary Figure 8:</b> AaBioW mutant reaction with pimelic acid                     | 11   |
| <b>Supplementary Figure 9:</b> AaBioW Arg 132→Ala mutant reactions                          | 12   |
| <b>Supplementary Figure 10:</b> AaBioW Arg201→Ala mutant reactions                          | 13   |
| <b>Supplementary Figure 11:</b> AaBioW Arg 215→Ala mutant reactions                         | 14   |
| <b>Supplementary Figure 12:</b> Model of thioester formation conformation                   | 15   |

**Supplementary Table 1. Primers used for cloning of wild type BioW and variants.**

All mutants were created by primer extension with the exception of His16→Ala, for which Quick-Change mutagenesis was used. Uppercase nucleotides are the Ligation Independent Cloning (LIC) overhangs.

| <b><i>A. aeolicus</i></b> |                                                   |
|---------------------------|---------------------------------------------------|
| BioWA-f                   | TACTTCCAATCCAATGCAatggatcttttcagtgtaagaatg        |
| BioWA-r                   | TTATCCCACTTCCAATGTTATTAttataactcaattagaactacttttt |
| BioW_Nde1                 | aagcagccgcatatggatcttttcag                        |
| BioW_Xho1                 | ctagctcgagttataactcaattagaa                       |
| BWAH16_F                  | cagaaaaacggaaaggccgtctcgggagcgga                  |
| BWAH16_R                  | ctcttttttactatccttccgctcccagac                    |
| BWA-132A-f                | gaagaggacaaggaagcgggagtaagaaccatt                 |
| BWA-132A-r                | aatggttcttactccgcttcttgcctctc                     |
| BWA-159A-f                | gaaggctacaccctagcaactgtgacgctctg                  |
| BWA-159A-r                | cagagcgtcaacagttgctaggggttagccttc                 |
| BWA-182A-f                | gcgagctttgctgggctgatgatcccgat                     |
| BWA-182A-r                | atcgggatcatcagcccagcaaagctccgc                    |
| BWA-187A-f                | agtgatgatcccgatgccgtcacgggatacgtt                 |
| BWA-187A-r                | aacgtatcccgtgacggcatcgggatcatcact                 |
| BWA-199A-f                | ggaaaggaaataggagccgtcaggataactccc                 |
| BWA-199A-r                | gggagttatcctgacggctcctatttccttcc                  |
| BWA-201A-f                | gaaataggatacgtcgcgataactccctgaag                  |
| BWA-201A-r                | cttcaaggagttatcgcgacgtatcctatttc                  |
| BWA-215A-f                | gatcctttgggaggagcggtttacttcgtaagc                 |
| BWA-215A-r                | gcttacgaagtaaaccgctccgcccaggatc                   |

**Supplementary Table 2. Data collection, phasing and refinement statistics**

|                                                    | Native                                        | Pimelate<br>(SeMet)                           | AMP-CPP+<br>Mg <sup>2+</sup> +Pimelate        | CoA+AMP                                       |
|----------------------------------------------------|-----------------------------------------------|-----------------------------------------------|-----------------------------------------------|-----------------------------------------------|
| <b>PDB Code</b>                                    | 5TV5                                          | 5TV6                                          | 5TV8                                          | 5TVA                                          |
| <b>Data collection</b>                             |                                               |                                               |                                               |                                               |
| Space Group                                        | P2 <sub>1</sub> 2 <sub>1</sub> 2 <sub>1</sub> |
| Cell: a, b, c (Å)                                  | 56.7, 68.2, 158.4                             | 68.5, 103.2, 113.8                            | 68.6, 105.3, 111.9                            | 55.7, 68.9, 156.6                             |
| Resolution (Å) <sup>1</sup>                        | 50-2.5 (2.51-2.5)                             | 50-2.45 (2.49-2.45)                           | 48-2.55 (2.56-2.55)                           | 50-2.25 (2.35-2.25)                           |
| Total reflections                                  | 147,152                                       | 217,857                                       | 223,869                                       | 235,772                                       |
| Unique reflections                                 | 22,008                                        | 30,059                                        | 27,824                                        | 29,328                                        |
| R <sub>sym</sub> (%)                               | 13.5 (56.0)                                   | 9.0 (86.0)                                    | 10.3 (93.8)                                   | 7.6 (98.8)                                    |
| I/σ(I)                                             | 11.9 (3.8)                                    | 20.9 (1.8)                                    | 16.5 (2.2)                                    | 18.5 (2.6)                                    |
| Completeness (%)                                   | 99.8 (63.1)                                   | 99.8 (97.5)                                   | 99.5 (85.9)                                   | 99.9 (100)                                    |
| Redundancy                                         | 6.7 (6.8)                                     | 7.3 (5.6)                                     | 8.0 (6.8)                                     | 8.0 (8.3)                                     |
| <b>Refinement</b>                                  |                                               |                                               |                                               |                                               |
| Resolution (Å)                                     | 42.0-2.5                                      | 50-2.45                                       | 25-2.55                                       | 38.1-2.25                                     |
| No. reflections                                    | 21,955                                        | 27,317                                        | 26,362                                        | 29,312                                        |
| R <sub>work</sub> / R <sub>free</sub> <sup>2</sup> | 20.6/27.0                                     | 19.0/23.0                                     | 18.4/22.9                                     | 20.1/24.5                                     |
| Number of atoms                                    |                                               |                                               |                                               |                                               |
| Protein                                            | 3,826                                         | 3,776                                         | 3,834                                         | 3,831                                         |
| Ligand                                             | -                                             | 86                                            | 84                                            | 94                                            |
| Water                                              | 159                                           | 184                                           | 129                                           | 109                                           |
| B-factors                                          |                                               |                                               |                                               |                                               |
| Protein                                            | 39.3                                          | 44.8                                          | 62.4                                          | 53.9                                          |
| Ligand                                             | -                                             | 44.6                                          | 70.4                                          | 55.1                                          |
| Water                                              | 35.3                                          | 40.1                                          | 53.7                                          | 50.3                                          |
| R.m.s deviations                                   |                                               |                                               |                                               |                                               |
| Bond lengths (Å)                                   | 0.008                                         | 0.009                                         | 0.007                                         | 0.009                                         |
| Bond angles (°)                                    | 1.023                                         | 1.272                                         | 1.265                                         | 1.135                                         |

1. Highest resolution shell is shown in parenthesis.

2. R-factor =  $\Sigma(|F_{obs}| - k|F_{calc}|) / \Sigma |F_{obs}|$  and R-free is the R value for a test set of reflections consisting of a random 5% of the diffraction data not used in refinement.

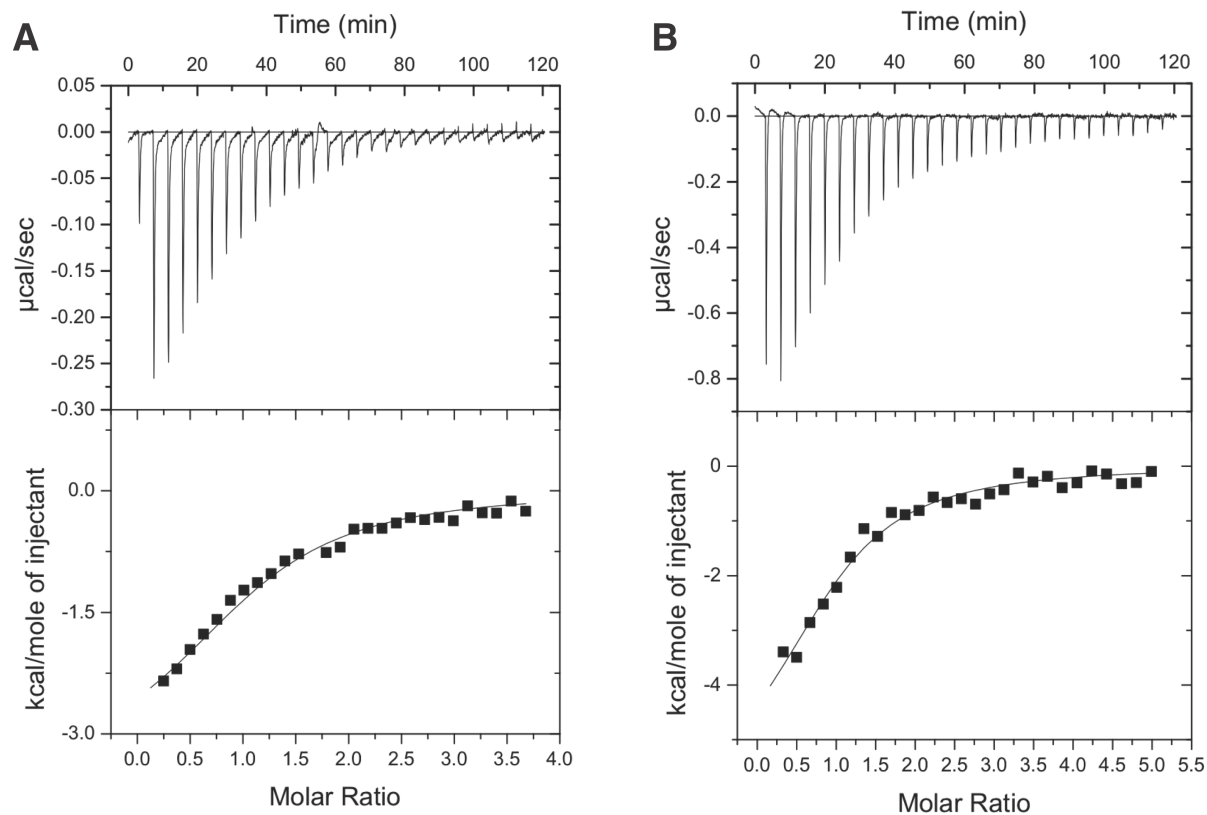

**Supplementary Figure 1. Binding isotherms for BioW.** Binding isotherms from ITC measurement of AaBioW binding to (A) ATP and (B) CoA.

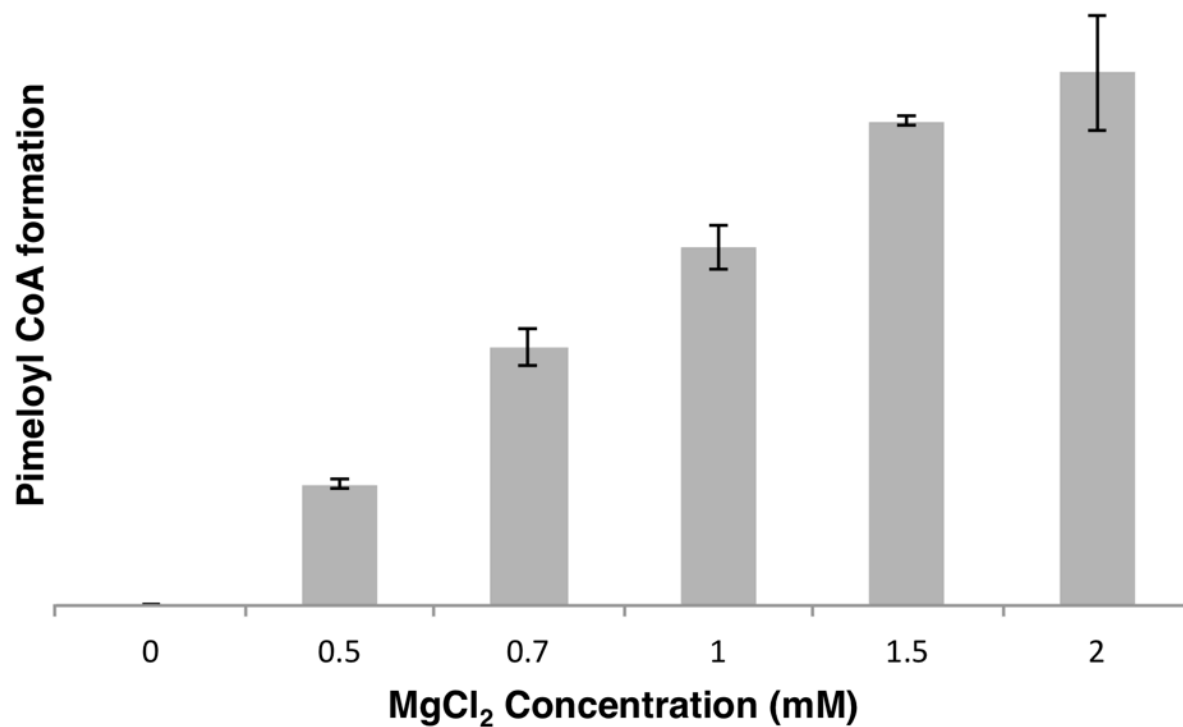

**Supplementary Figure 2. Dependence of BioW activity on Mg<sup>2+</sup>.** Reactions to test the requirement for Mg<sup>2+</sup> contained 20 mM HEPES, 0.2 mM DTT, 1 mM CoA, 1 mM ATP and 3  $\mu$ M AaBioW. Reactions were done at 42°C for 6 h. A control reaction without any additional MgCl<sub>2</sub> was run with 1 mM EDTA added.

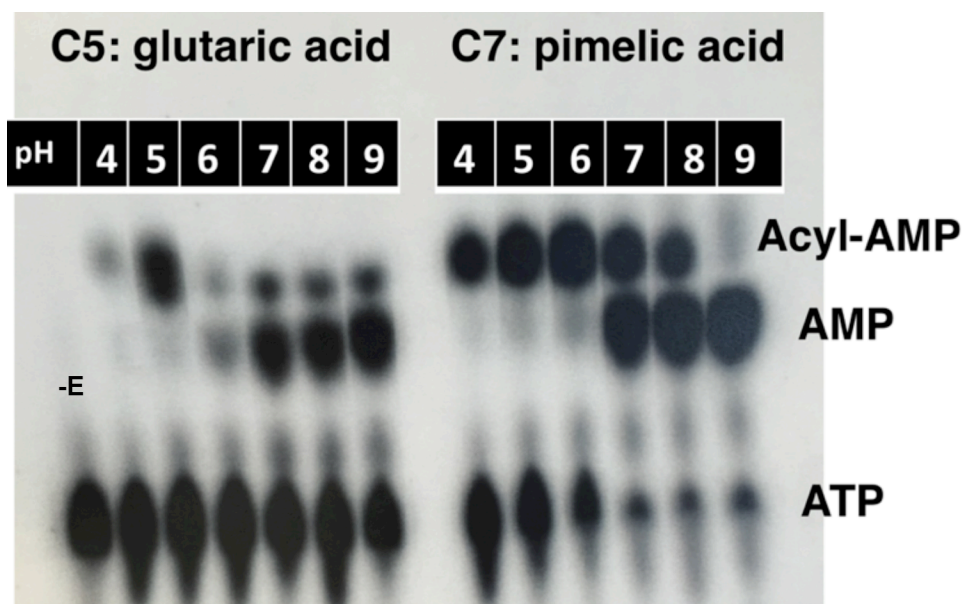

**Supplementary Figure 3. Proofreading of dicarboxylate-adenylates as a function of pH.** All reactions were carried out in the absence of CoA in order to determine the stability of the acyl-AMP intermediate, as determined by generation of AMP. With the cognate pimelate (C7) substrate, the acyl-AMP intermediate is hydrolyzed at pH greater than 6. For the non-cognate glutarate (C5) substrate, increased pH did not have as significant an effect on hydrolysis of the adenylate. At pH 4 the enzyme has only a low level of activity with either substrate. The left most lane lacked enzyme (-E)

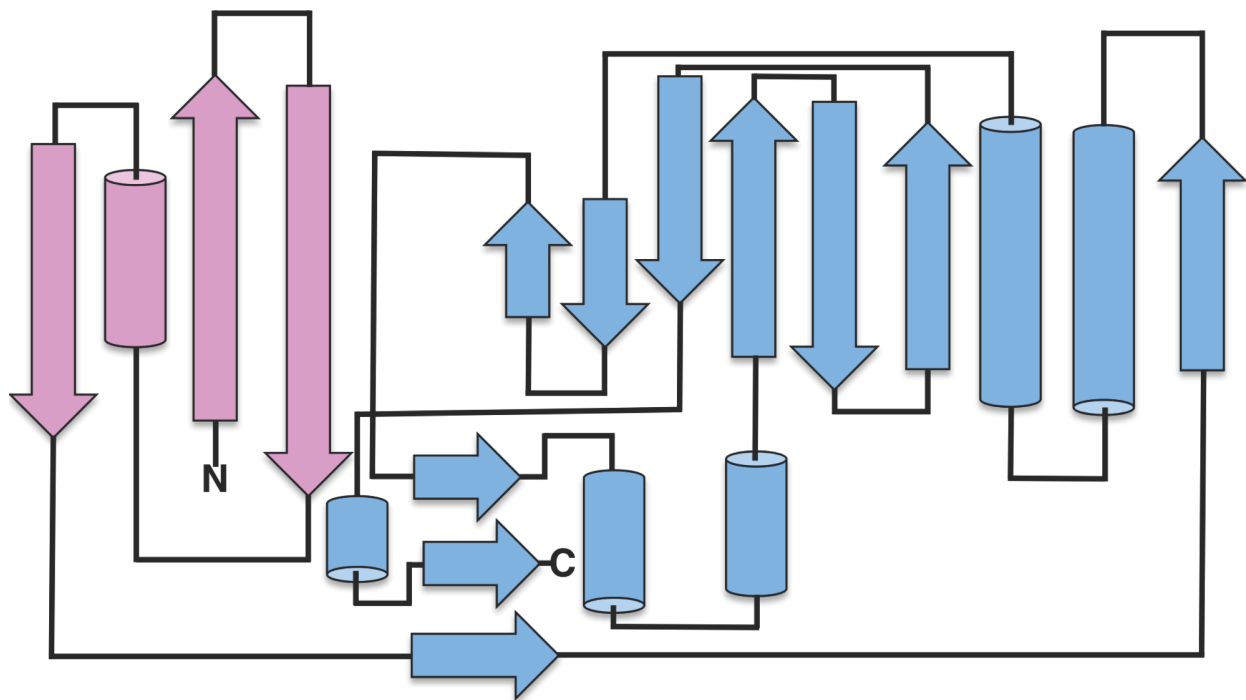

**Supplementary Figure 4: Topology of AaBioW.** Topology diagram showing the overall fold of BioW. Domains are colored using the same scheme as in Figure 3.



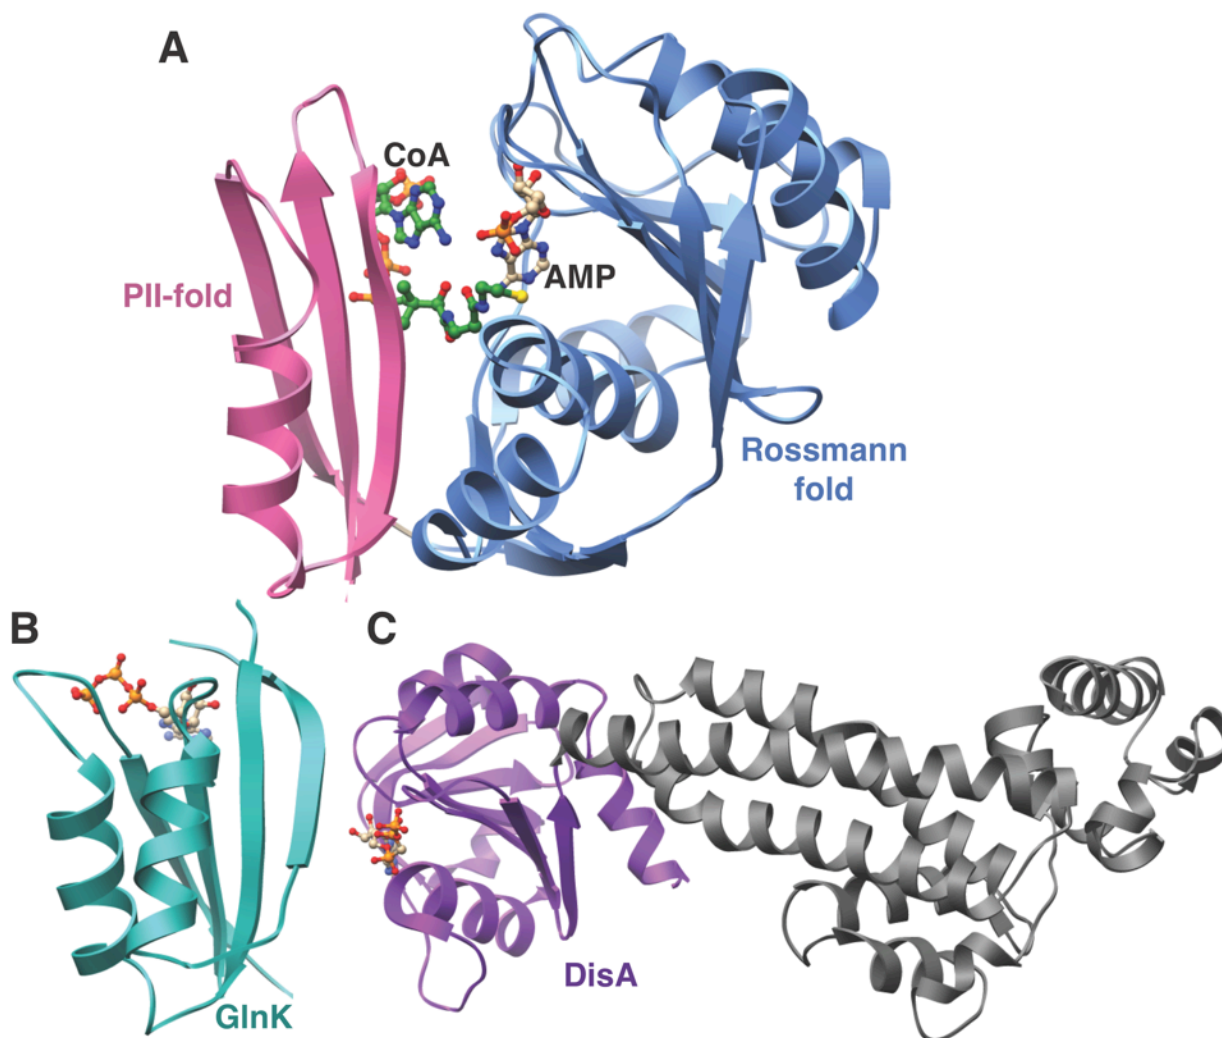

**Supplementary Figure 5. Structural homologs of BioW.** (A) The structure of the AaBioW complex with bound CoA and AMP. The P<sub>II</sub> fold domain is colored in pink and the Rossmann fold is colored in light blue. (B) Structure of the P<sub>II</sub> fold protein GlnK<sup>1</sup> (in cyan) in complex with ATP (PDB Code: 2GNK). (C) Structure of the diadenylate cyclase DisA<sup>2</sup> with bound AMP (PDB Code 3C23). The Rossmann fold domain is colored in purple.

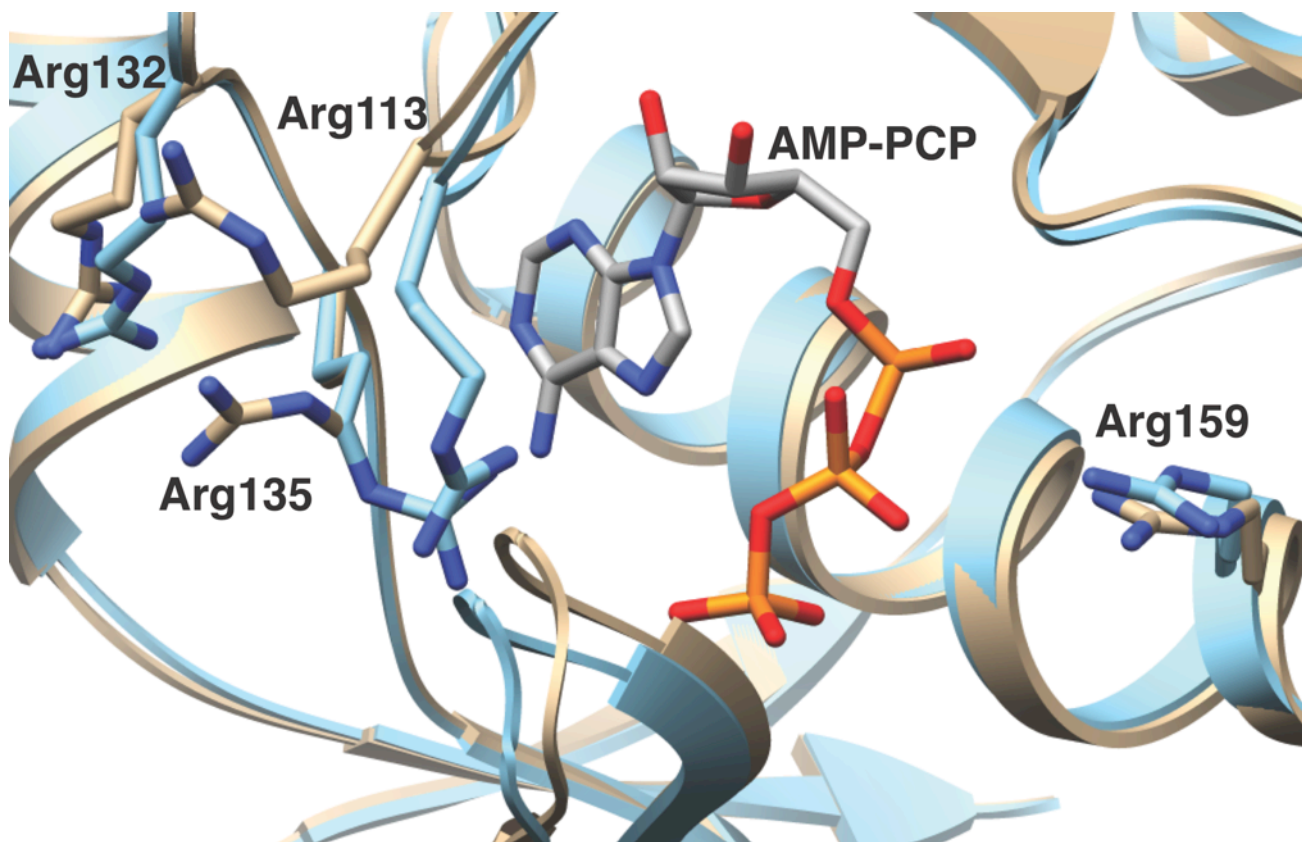

**Supplementary Figure 6. Side chain movement of active site Arg side chains during catalysis.** Superposition of cocrystal structures of AaBioW with bound AMP-PCP (shown in light brown) and with bound CoA (shown in cyan). Note the movement of multiple active site Arg residues between the adenylation and thioester formation complexes. These movements are necessary to accommodate binding of the different substrate ligands.



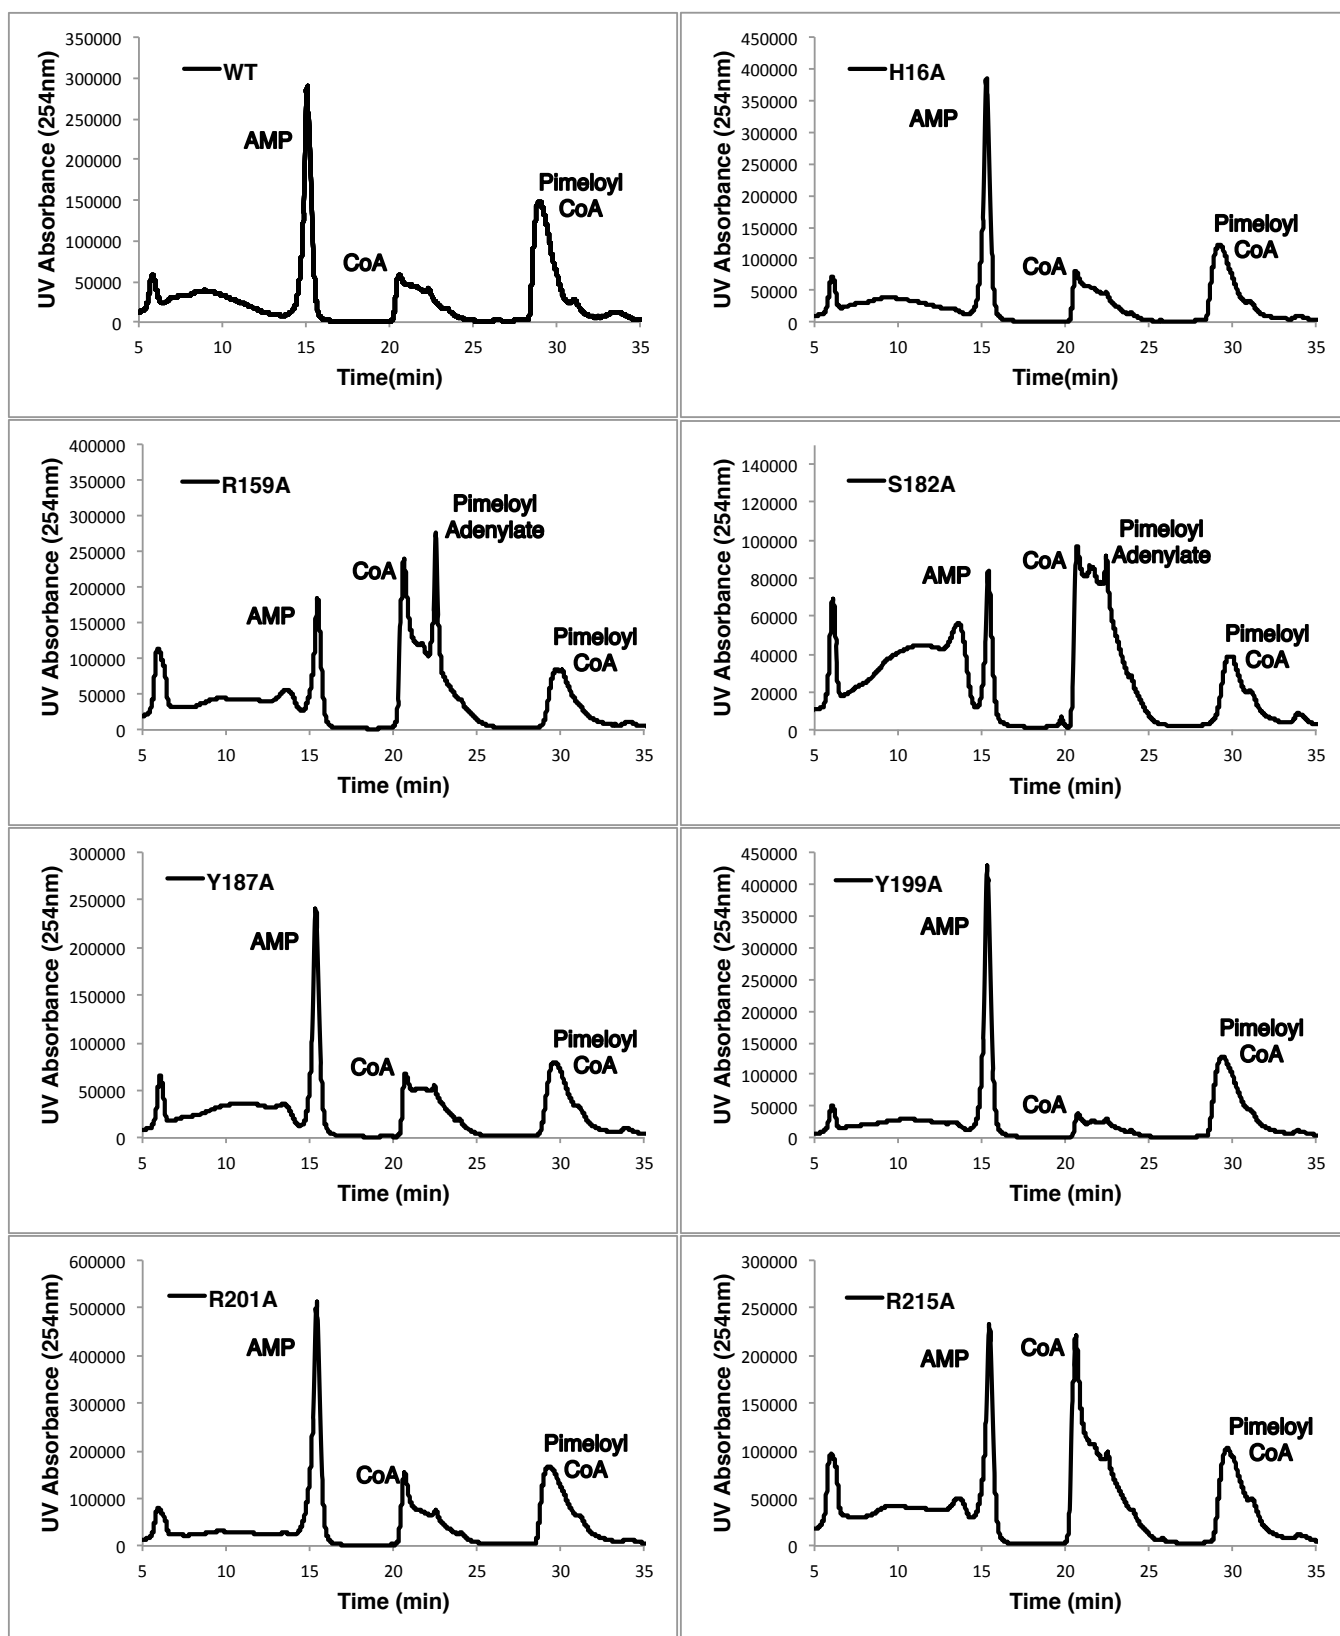

**Supplementary Figure 8. Pimelic acid reactions with wild type (WT) and mutant BioW proteins.** HPLC traces (absorbance at 254 nm) for reactions of wild-type and mutant AaBioW proteins with pimelic acid as the substrate. All products were confirmed by mass spectrometry.

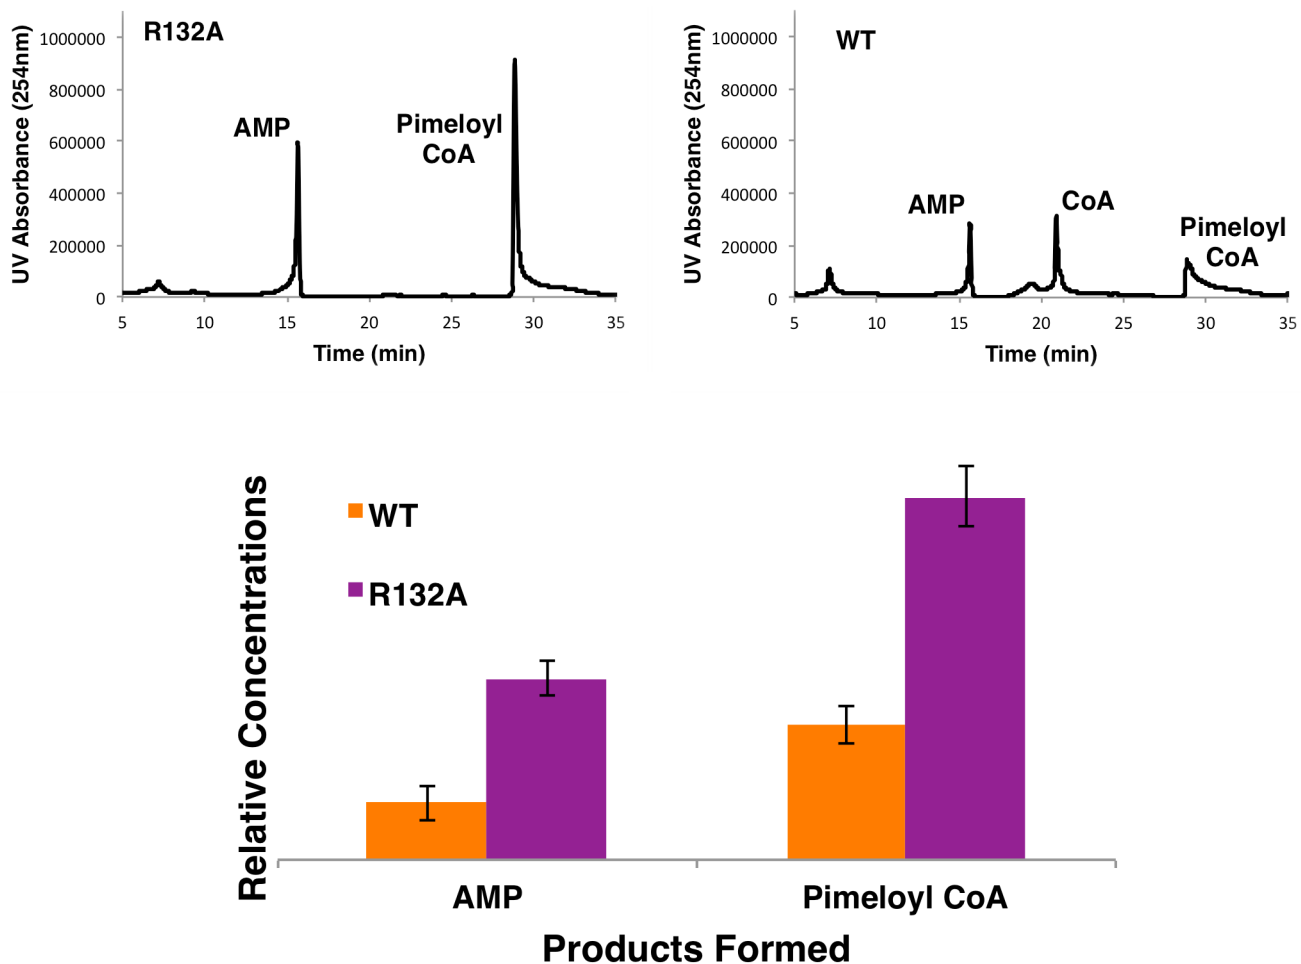

**Supplementary Figure 9. Activity of the Arg132→Ala mutant with pimelate.** HPLC traces (absorbance at 254 nM) for wild-type AaBioW (top left) and the Arg132→Ala (top right) mutant with pimelate. The bottom panel shows the relative amounts of both AMP and pimeloyl-CoA product formed for both enzymes. Reactions were run on buffer containing 20 mM HEPES, 100 mM NaCl, 0.2 mM DTT, 2 mM MgCl<sub>2</sub>, 1 mM ATP, 1 mM pimelate, 0.5 mM CoA and 10 μM protein for 4 hours at 50°C.

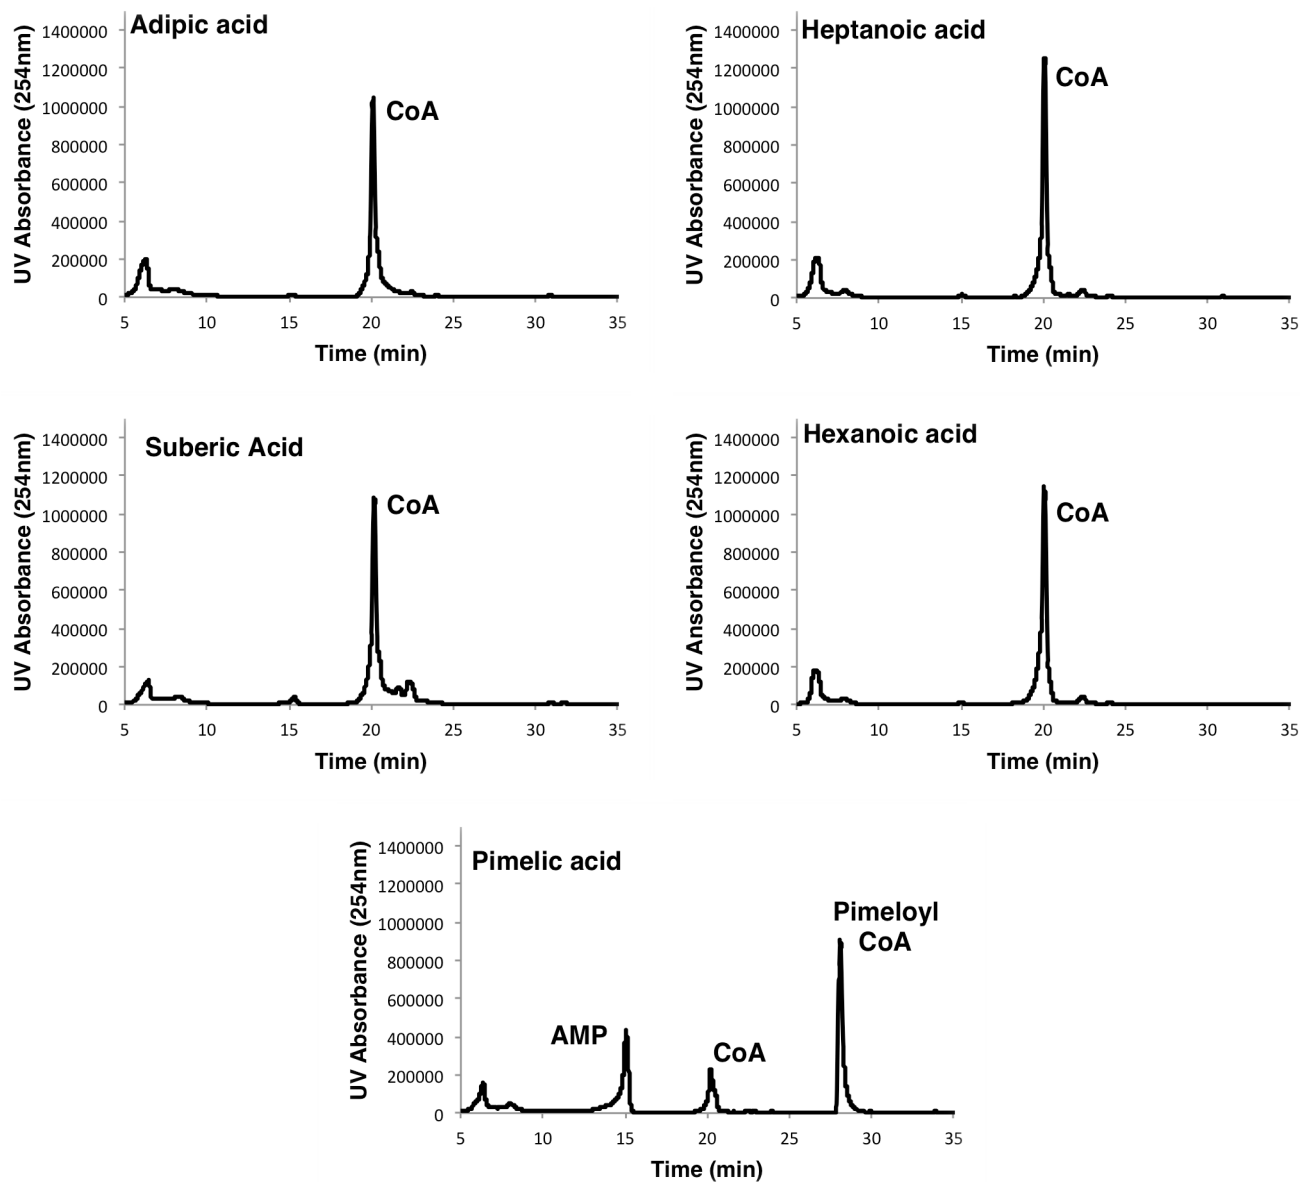

**Supplementary Figure 10. Arg201→Ala mutant with substrates.** HPLC traces (absorbance at 254 nM) traces for AaBioW Arg201→Ala mutant with different mono- and di-carboxylate substrates.

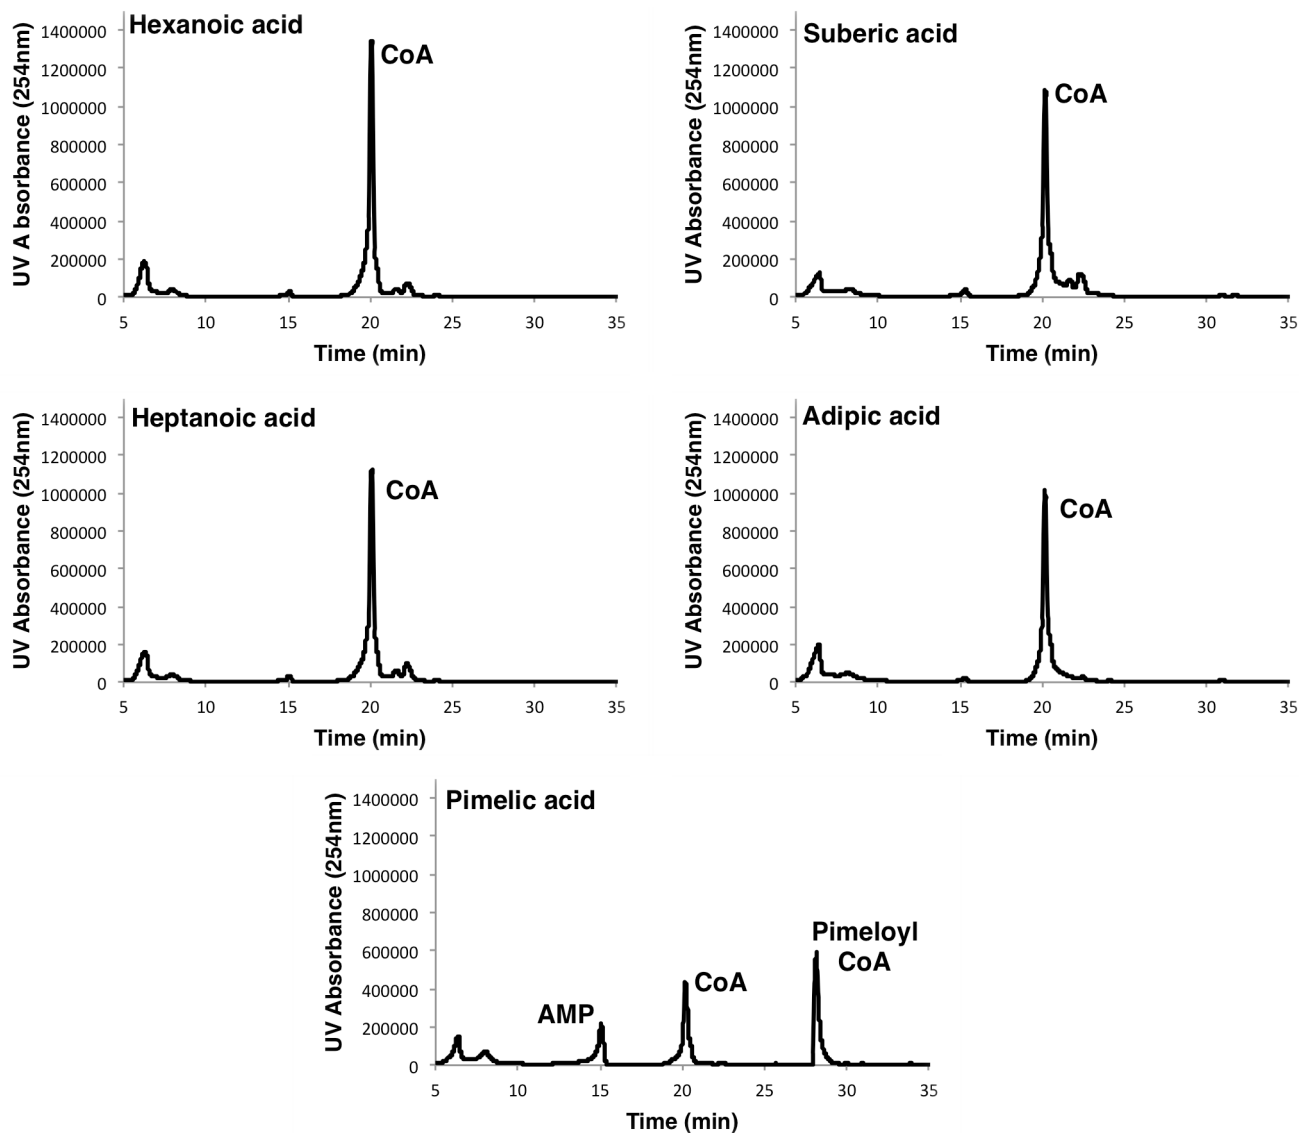

**Supplementary Figure 11. Arg215→Ala mutant with substrates.** HPLC traces (absorbance at 254 nm) traces for AaBioW Arg215→Ala mutant with different mono- and di-carboxylate substrates.

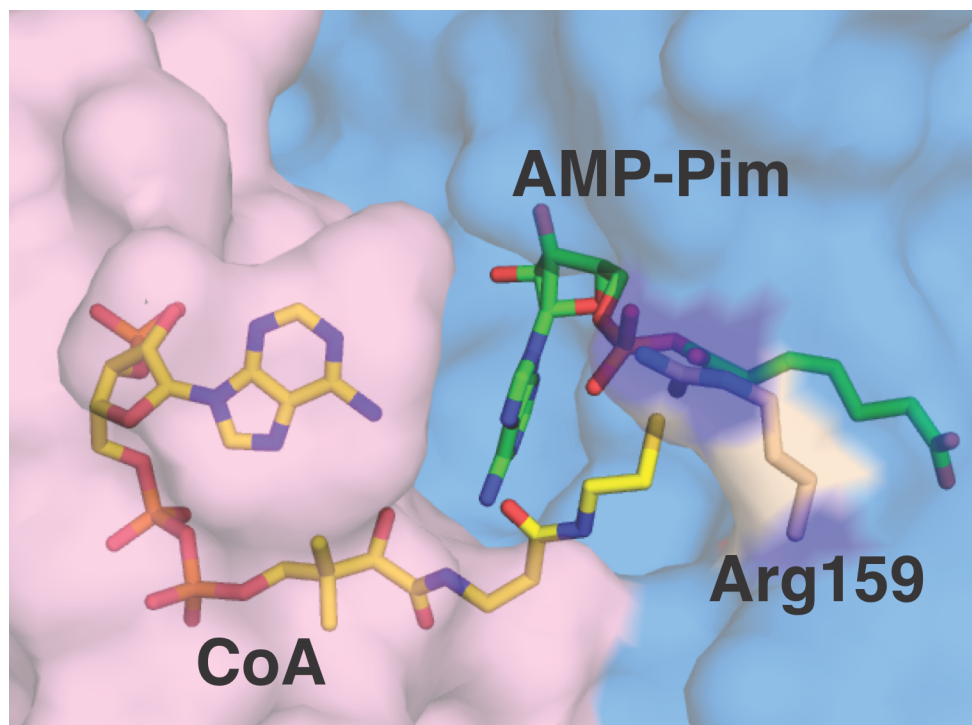

**Supplementary Figure 12: Model of thioester formation conformation.** Surface representation of the AaBioW active site based on the model from Figure 5B. The P<sub>II</sub> and the Rossmann fold domains are shown as pink and blue surfaces, respectively, and CoA (yellow) and pimeloyl-AMP (green) are shown as sticks.
